# The Role of Frailty in Shaping Social Contact Patterns in Belgium, 2022-2023

Neilshan Loedy<sup>\*1</sup>, Lisa Hermans<sup>1</sup>, Maikel Bosschaert<sup>1</sup>, Andrea Torneri<sup>1</sup>, Niel Hens<sup>1,2</sup>

<sup>1</sup> Data Science Institute, Hasselt University, Hasselt, Belgium

<sup>2</sup> Centre for Health Economics Research and Modelling Infectious Diseases, Vaccine & Infectious Disease Institute, University of Antwerp, Antwerp, Belgium

<sup>\*</sup>Corresponding author: [neilshan.loedy@uhasselt.be](mailto:neilshan.loedy@uhasselt.be)

## Abstract

Social contact data are essential for understanding the spread of respiratory infectious diseases and designing effective prevention strategies. However, many studies often overlook the heterogeneity in mixing patterns among older age groups and individual frailty levels, assuming homogeneity across these sub-populations. This oversight may undermine non-pharmaceutical interventions by not targeting specific contact behaviours, potentially reducing their effectiveness in controlling disease. To address this gap, we conducted a contact survey in Flanders, Belgium (June 2022 to June 2023). Using this dataset, we reconstructed frailty-dependent contact matrices and developed a contact-based mathematical model that integrates frailty levels to investigate their impact on disease transmission dynamics. We collected data from 5,723 participants who recorded 31,375 contacts with distinct individuals. Contact patterns were observed to vary based on participants' age and frailty levels, influenced by the locations of their interactions. Incorporating frailty levels into the mathematical model substantially alters the shape of epidemic curves and peak incidences. Such insights are crucial for designing tailored non-pharmaceutical interventions, indicating the need for similar data collection in different countries.

**Keywords:** Infectious Diseases, Disease transmission, Mathematical Modeling, Social contact, Frailty, Older adults.

## 1. Introduction

Individuals within a population exhibit varying characteristics that influence infectious disease transmission [1,2]. These individual-level heterogeneities can arise from various sources, such as varying individual infectiousness or the infectious period (physiological mechanisms) or varying contact rates with infection sources (behavioural mechanisms) [2]. In various environments, individuals' behavioural heterogeneity can be seen in varying degrees of contact interactions, being dependent on biological ages, genders, health conditions, and social classes (with expected variations in e.g., seasons). These heterogeneities, particularly among older individuals, can significantly impact transmission dynamics. Given that this age group significantly contributes to the infectious disease burden (e.g., 92% of hospitalisations for Herpes Zoster Virus in Italy and 86% for SARS-CoV-2 Virus in England, Scotland, and Wales occur in individuals over 50 years of age [3,4]), understanding contact patterns within this subpopulation is crucial. This need is further amplified by demographic trends suggesting a growing elderly population, which is more susceptible to infections due to age-related immune decline [5,6].

48 Frail and older populations account for a significant proportion of the health burden,  
49 influenced by both biological age and individual health conditions [7]. Therefore,  
50 understanding transmission dynamics is crucial for adequately determining suitable public  
51 health interventions. However, while transmission models offer valuable insights in  
52 understanding disease dynamics, their accuracy is dependent on reliable data on social  
53 interactions. This reasoning motivates the collection of social contact data, primarily  
54 collected through diary-based social contact surveys, which has been instrumental as an  
55 essential tool in parameterising mathematical disease models to understand the dynamics of  
56 infectious disease transmission within the population [8-12]. An example is the  
57 groundbreaking POLYMOD study, which is a large-scale survey that gathered data from  
58 eight European countries with age groups focusing on mainly young adults and adults <sup>12</sup>.  
59 Another example is the CoMix study, which aimed at collecting social contact behavior  
60 during the COVID-19 pandemic, highlighting the impact of non-pharmaceutical interventions  
61 following the outbreak [9-11,13-18]. However, there are significant knowledge gaps, as  
62 social contact surveys that specifically focus on older adults are scarce. This demographic,  
63 despite its substantial contribution to disease burden, have been underrepresented in  
64 existing studies, hindering comprehensive understanding and precise modeling of disease  
65 transmission dynamics within this population.

66

67 Although limited, there have been studies on social contacts that specifically target older  
68 individuals [19], individuals with chronic illnesses [20], and frail individuals [21]. These  
69 studies show that these groups differ not only in the amount of their social interactions but  
70 also in the way they interact within the population. Nevertheless, little information is available  
71 on which survey and sampling methods are most effective in conducting such a study in this  
72 age group. As an illustration, older individuals might encounter challenges when it comes to  
73 completing a paper diary, necessitating the need for an in-person interview. It is commonly  
74 observed that older individuals tend to favour paper questionnaires as their preferred format,  
75 while the suitability of digital approaches for studying health conditions in the older  
76 population remains a matter of debate [22]. Since digital questionnaires are faster to  
77 distribute (or collect) and pose less burden on a competent participant, exploring the viability  
78 of a digital survey holds significance for expanding the survey to other countries, especially  
79 in years to come.

80

81 This study presents the findings of the Epicurus contact survey study, conducted in  
82 Flanders, Belgium. The study explores social mixing patterns across age groups and frailty  
83 levels, focusing on older individuals, by including those with chronic conditions and/or  
84 residing in healthcare facilities. Furthermore, we analyze how mixing patterns and frailty  
85 levels of participants and their contacts might influence disease transmission. Moreover, the  
86 study can also serve as a basis for refining data collection protocols, identifying areas for  
87 improvement, and informing the design of similar large-scale, multi-country studies in the  
88 future across different European countries.

89

90

## 91 **2. Methods**

### 92 **2.1. Study design**

93 Information on social contacts was obtained cross-sectionally, with the assistance of a  
94 market research company. The survey employed a randomized design within the general

95 population, conducted from June 2022 to June 2023. Participants were enlisted (sampling  
96 methods) through a database of the National Registry (n.040/2022), acquired from Statbel,  
97 and delivered to the market research company. To encompass individuals residing in care  
98 facilities, sampling was done through a list of government-recognised facilities. In this study,  
99 we refer to a facility which provides long-term housing and a range of services for individuals  
100 aged 65 years and older who can no longer live independently at home. These services  
101 include household assistance, daily task support, and health care, including nursing care.  
102 Different survey methods were used: physical paper forms (paper-based), face-to-face  
103 interviews (paper-based), online submissions (Computer-Assisted Web Interface (CAWI)), or  
104 through a dedicated app (app-based).

105  
106 Five target populations were recruited using a stratified sampling approach adjusted by age  
107 to ensure a representative sample of the Flanders population (Table S1). The invitation to  
108 participate in the survey was divided into three waves: the first wave was conducted during  
109 the Summer period (June 14, 2022 - August 18, 2022, and May 10-22, 2023; 20% send-  
110 outs), the second wave was carried out in the Fall period (September 5 - December 16,  
111 2022; 40% send outs), and the third wave was conducted in the Winter period (January 23 -  
112 April 14, 2023; 40% send outs). This percentage resulted from the intention to include more  
113 participants who experience ILI (Influenza-Like Illness) or RSV symptoms during the fall and  
114 winter seasons. To achieve the targeted participation rate among individuals aged 22-99  
115 with chronic conditions or experiencing ILI symptoms, additional invitations were sent during  
116 fall and winter. These invitations were adjusted by age and mainly sent during winter months  
117 to increase the sample size of participants experiencing ILI symptoms. Respondents from  
118 these additional invitations who did not have chronic conditions, nor were experiencing ILI  
119 symptoms, were categorised into the general population. Sampling in care facilities and the  
120 app-based group was terminated upon reaching the desired sample sizes due to cost  
121 considerations.

122  
123 The survey collected demographic information (age, gender, etc.) and vaccination status  
124 against influenza and COVID-19. Additionally, participants were asked to complete a contact  
125 diary, recording all face-to-face interactions on a specific day (defined as in-person  
126 conversations consisting of three or more words, with or without skin-to-skin contact,  
127 between 5 am the previous day and 5 am on the survey day), with the number of potentially  
128 recorded contacts in a day was limited to 30 (versus 29 to 90 in other studies [12,23]).  
129 Details captured for each contact included gender, age range, location(s), intimacy level,  
130 frequency, and duration. Participants' Frailty Index (FI) was measured based on their  
131 responses to EuroQol-5 Dimension (EQ-5D) and Short Form Survey-36 (SF-36) questions  
132 [24-25], evaluated with the accumulation of deficits approach [26-29]. This well-validated FI  
133 captures a broad spectrum of medical conditions (e.g., comorbidities, physical function, and  
134 mental well-being) and has been widely used in various international studies [30]. As done  
135 by Curran et al. (2021), we divided each participant into one of three subgroups based on  
136 their frailty score: non-frail ( $FI \leq 0.08$ ), pre-frail ( $0.08 < FI \leq 0.25$ ), or frail ( $FI > 0.25$ ) [29]. If  
137 a participant had over 10 quality of life components that were not answered, their Frailty  
138 Index (FI) was considered as 'missing' unless their available data clearly showed that they  
139 already had a high enough score to be classified as frail. Notably, participants aged two  
140 years or younger are assumed to be categorized as non-frail as they were not yet able to  
141 complete the EQ-5D and SF-36 questions.

142

### 143 **2.3. Statistical analysis for the number of reported contacts**

144 We developed right-censored negative binomial generalized linear mixed models to examine  
145 the factors influencing the average number of contacts reported inside and outside the  
146 participant's home. In this study, the term "home" refers to the domicile of the participant,  
147 encompassing houses, apartments, or healthcare facilities. The models incorporated frailty  
148 levels and adjusted for other participant characteristics. We performed variable selection  
149 using a random forest analysis and the likelihood ratio test (LRT). The reported contacts  
150 were right censored at 30 contacts due to a limited number of possible diary entries and  
151 were fitted using penalized maximum likelihood within the *'gamlss'* package in R [31]. Social  
152 mixing patterns were further investigated by constructing age-stratified ([0, 50), [50, 60), [60,  
153 750), ..., [90, 100)) contact matrices for different locations of contacts (inside or outside the  
154 home) [12]. The *'socialmixr'* package in R was employed with post-stratification weights to  
155 account for the distinction between weekdays and weekends when generating the contact  
156 matrices [32].

157

### 158 **2.4 Mathematical compartmental transmission model**

159 In this study, we utilize a discrete-time age-structured compartmental model which  
160 incorporates contact matrices for age-specific transmission rates, previously developed by  
161 Abrams et al. (2021) [9]. The model is extended to account for age and frailty mixing  
162 patterns, enabling the investigation of a COVID-19-like disease's spread and assessing the  
163 impact of frailty-dependent interactions within the Belgian population (**Supplementary**  
164 **Material**). This model assumes that individuals become infectious (symptomatic or  
165 asymptomatic) after a latent period. Symptomatic cases may progress to severe illness  
166 requiring hospitalisations or being admitted to the intensive care unit (ICU), where they are  
167 assumed to be isolated and can not transmit the disease. We initialized our disease  
168 transmission model on March 1st, 2020, to reflect the early stages of the COVID-19  
169 pandemic (Wuhan strain, without vaccination). Simulations were conducted for the Belgian  
170 population of 2020 (timestep: 1 day) over 100 days.

171

172 The model uses parameter values from previous studies on COVID-19 vaccination  
173 strategies, which were calibrated in parallel with this study (**Table S2**) [9,33]. To tailor the  
174 model to the observed data, we set the initial population and distribution of infected  
175 individuals across age groups and frailty levels to be proportional to the survey data (**Table**  
176 **S3**). To compare the impact of different mixing assumptions on transmission dynamics, we  
177 conducted two analyses: one using a constant proportionality factor ( $q$ ) capturing host- and  
178 disease-specific characteristics, and the other using a constant basic reproduction number  
179 ( $R_0 = 2.90$ ) calculated with the next-generation matrix approach for COVID-19 [9,34]. The  
180 effects of various contact-level assortativity on transmission dynamics were analyzed using  
181 three different scenarios: proportional, uniform, and full assortativity. In the proportional  
182 scenario, contact-level assortativity reflects the proportion of frailty levels obtained from the  
183 survey. In the uniform scenario, the assortativity is identical across all frailty levels. Lastly,  
184 the full assortativity scenario simulates individuals who only come into contact with others  
185 who have the same level of frailty. To isolate the effect of altered contact patterns on disease  
186 spread, we assumed homogeneous parameters across frailty levels. This simplification  
187 enabled us to attribute any observed changes in transmission patterns primarily to variations  
188 within the contact matrices.

189

190

191

## 192 **3. Results**

### 193 **3.1 Study population**

194 Approximately 31,000 letters (55% main and 45% additional invitations) were dispatched to  
195 the participants within the random sample generated by the National Registry. The overall  
196 response rate was 19.34% ( $n = 5,995$ ). The majority of subpopulations from the collected  
197 sample exceeded the desired target study population, except for the ILI subpopulation,  
198 which only reached 0.3% of the expected quota (**Table S1**). Notably, a preference for the  
199 paper-based survey (66.67%) was observed compared to the computer-based version  
200 (CAWI or app-based) (33.32%). Of the initial respondents, 272 individuals did not consent to  
201 participate, and one participant was excluded because they did not comply with the contact  
202 reporting guidelines (the reported contact was not from the day preceding the survey). The  
203 final analysis included 5,723 consenting participants (44.18% male, 53.45% female) who  
204 reported 31,375 contacts (**Table S4**).

205

206 The mean participant age was 53.4 years, with a median of 59 years (IQR: 37-71). Around  
207 70% and 90% of participants who used the Computer-Assisted Web Interface (CAWI) and  
208 app-based approach, respectively, were below the age of 60 years. Conversely, the paper-  
209 based survey skewed towards individuals over 60 (**Figure S1**). The data indicates that  
210 individuals over 70 years old generally tend to engage in volunteer work or remain  
211 unemployed (either retired or capable of working but not currently employed). Chronic health  
212 conditions were reported by 33.4% of participants, all exceeding 50 years old. Most of the  
213 participants resided in houses or apartments of size 2 (33.2%) or 3 (18.4%), while a small  
214 proportion (3.5%) resided in long-term care facilities (retirement or nursing homes (ROB:  
215 *Rustoord voor Bejaarden*; RVT: *Rust-Verzorgingstehuis*)), especially older individuals.  
216 Furthermore, frailty assessment revealed a significant association with biological age, with  
217 older participants tend to be in the more frail categories. Among the total sample, there were  
218 830 participants (14.50%) classified as frail, 1,749 (30.56%) as pre-frail, 2,681 (46.85%) as  
219 non-frail, and 463 (8.09%) were categorized as missing, as described in Section 2.1.

220

### 221 **3.2 Contact behavior and mixing patterns**

222 On average, participants report 5.48 contacts daily, with a median of 4 contacts (IQR: 2-7)  
223 (**Table S5**). When considering contacts reported outside the household (**Figure 1**), we  
224 observed a notable association between frailty and the number of reported contacts. Frailty  
225 status influences the average number of contacts, with frail individuals reporting fewer  
226 contacts compared to non-frail and pre-frail individuals. This decrease in contact varies with  
227 the degree of frailty and is more pronounced in older age groups. Note that the small number  
228 of non-frail individuals in the 80-89 and 90-100 age categories (0.8% and 0.2% of non-frail  
229 individuals, respectively) may lead to a noticeable discrepancy between the observed  
230 average number of contacts and the model-based number of contacts.



231

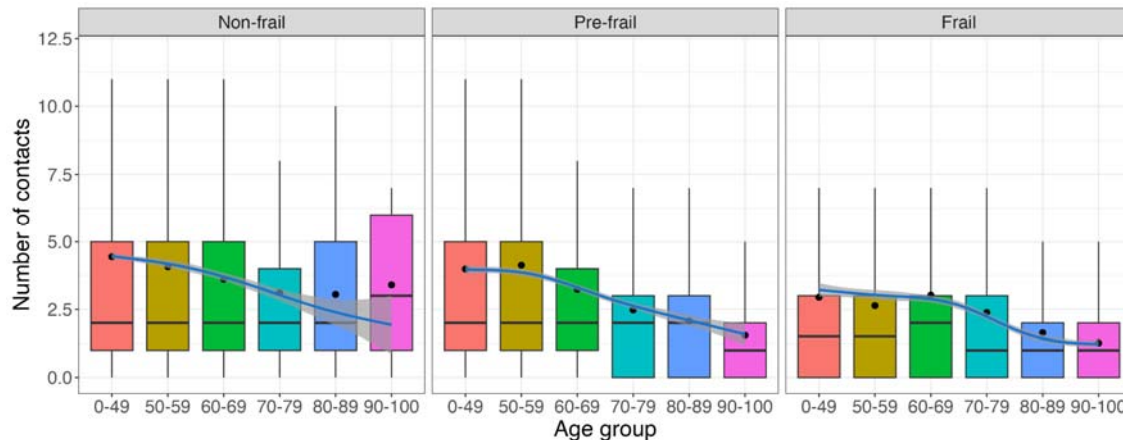

232

233

234

235

236

237

238

239

240

241

242

243

244

245

246

247

248

249

250

**Figure 1:** Number of contacts reported outside the household per participants' age group by their frailty level. Plots show the distribution of contacts, the average number of contacts (dots) and model results (mean as solid lines and 95% confidence intervals as shaded area).

A significant portion of contacts occurs with individuals of similar age, as indicated in the contact matrices for which higher values are reported on the diagonal (**Figure S2**). More precisely, older individuals (60-90 years) primarily interact with others in their age range, followed by interactions with younger adults (30-59 years). Intergenerational mixing occurred more inside participants' homes, particularly between younger individuals (under 18) and adults (30-50 years). Higher contact rates are observed when comparing contacts outside participants' homes with those reported inside. Pre-frail and non-frail individuals reported more contacts outside their homes compared to frail individuals (**Figure 2**). In contrast, frail individuals tended to report more contacts inside their homes. For individuals under 70 with frailty, these trends persisted with a higher number of outside contacts reported compared to those over 70 with frailty, who tended to have more contacts inside their homes. When considering participants with chronic conditions, we observe higher contact rates outside their homes, except for those over 70 years old, who reported more contacts within their homes (**Figure S3** - **Figure S5**).

251

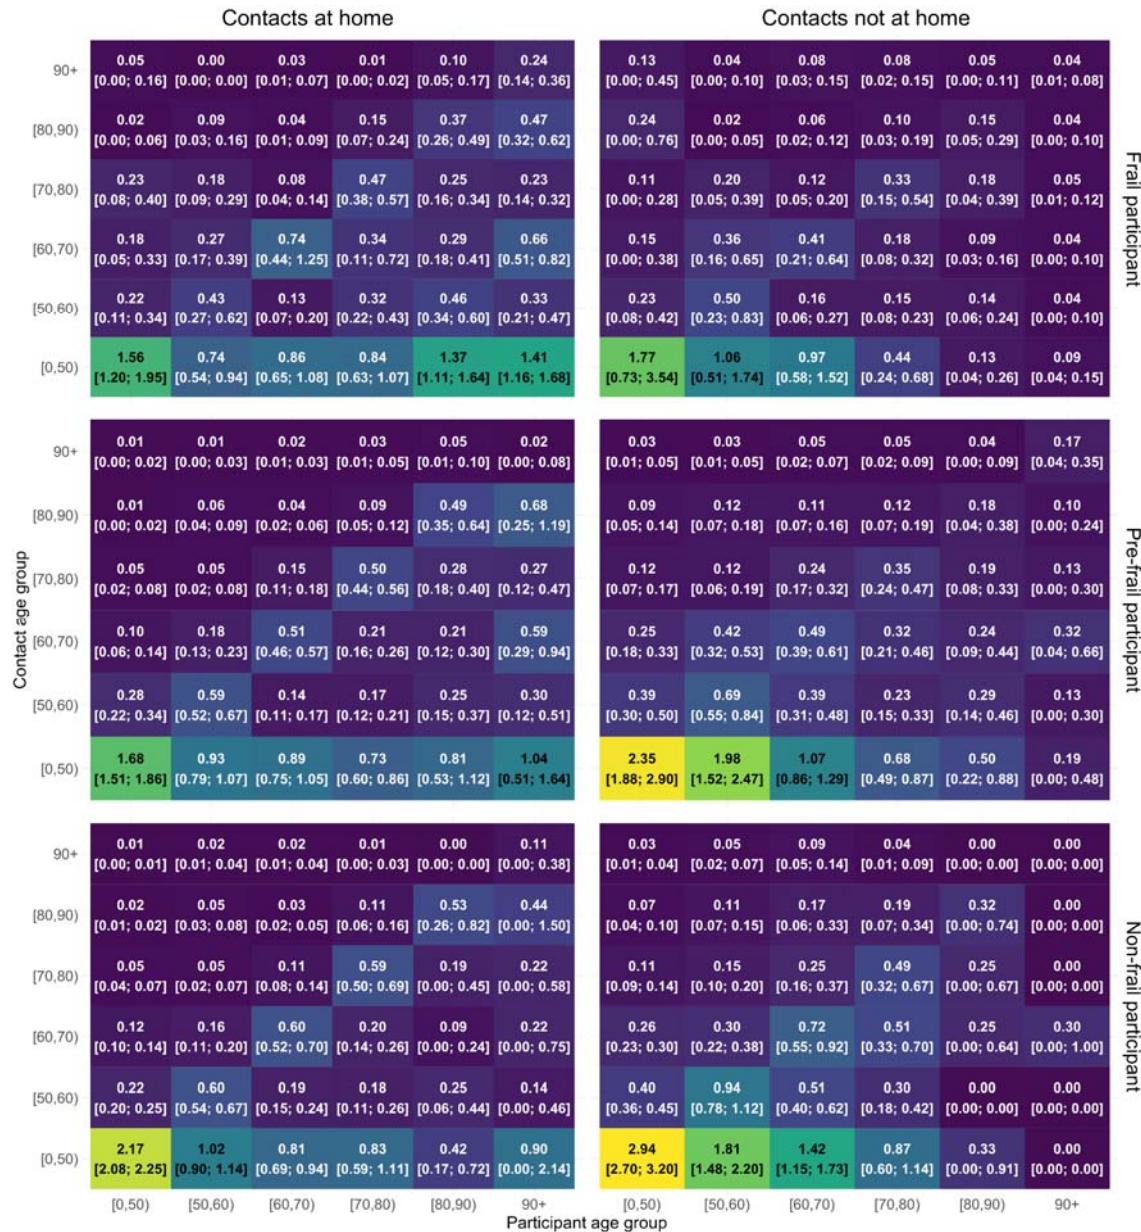

252

253

254

255

256

257

258

259

260

261

262

263

264

**Figure 2:** Contact matrices showing the mixing patterns of participants based on their frailty level for contacts reported inside and outside the household, together with 95% confidence intervals obtained from non-parametric bootstrap.

### 3.2 Contact characteristics

Variables expressing the number of contacts are selected based on the results of both random forest analysis (Figure S6) and the likelihood ratio test (Table S6). Table S7 presents the relative incidence (RI) with its 95% confidence interval (CI) obtained from GAMLSS models inferring the number of indoor and outdoor contacts based on these selected covariates. While holding other variables constant, the sample drawn from the care facilities reported more contacts (RI = 2.141 [1.797 - 2.550]) inside the home (Table S7). The gender variable had a significant effect on the number of contacts reported, with women

265 reporting a higher number of contacts inside (RI = 1.077 [1.012 - 1.146]) and outside (RI =  
266 1.066 [1.020 - 1.113]) the home. People who completed the questionnaire on paper tend to  
267 report more contacts, with a relative incidence of 2.293 [2.136 - 2.463] and 1.160 [1.106 -  
268 1.215] for outside and inside home contacts, respectively. Household size had different  
269 effects on inside and outside contacts; participants who lived alone tended to report more  
270 outside contacts (RI = 1.171 [1.054 - 1.298]), but this pattern was reversed for inside  
271 contacts (RI = 0.811 [0.731 - 0.900]). Unemployed people reported more contacts inside the  
272 home (RI = 1.087 [1.001 - 1.180]) compared to outside the home (RI = 0.641 [0.573 -  
273 0.716]), and compared to people who worked full time. Lastly, education also has a  
274 significant effect on out-of-home contacts, with participants holding undergraduate degrees  
275 generally reporting more contacts. More out-of-home contacts were reported during  
276 weekdays and non-holidays. There was an interaction between age and holidays on  
277 contacts, with older participants (above 50 years old) reporting fewer contacts during non-  
278 holidays, compared to children under nine years old. Non-frail individuals significantly report  
279 more contacts outside the home. Lastly, it was also found that there was an interaction  
280 between reported contacts and frailty level and whether or not participants completed the  
281 survey with assistance.  
282

### 283 **3.3 Mathematical compartmental transmission model**

284 The results of the simulation study indicate varying disease dynamics with a constant value  
285 of  $q$  across all mixing patterns (**Figure S7**). Full assortativity results in significantly lower  
286 peak epidemics (2.36, 0.45, 0.05 per 100,000 for non-frail, pre-frail, and frail groups,  
287 respectively), while uniform mixing yields the highest peak epidemics (5.01, 1.95, 0.74 per  
288 100,000 for non-frail, pre-frail, and frail groups, respectively), compared to other scenarios.  
289 When simulating epidemic outbreaks and keeping a constant value of  $R_0$ , we observed  
290 mixing patterns among different frailty levels affect disease transmission dynamics (**Figure**  
291 **3**). While attack rates across the three scenarios - proportional (0.78), uniform (0.81), and  
292 fully assortative (0.82) - show only a slight difference, the underlying patterns of disease  
293 transmission vary considerably. Under the full assortativity scenario, non-frail and pre-frail  
294 individuals experience the fastest epidemic peak (day 28) and highest incidence rates (5.92  
295 and 1.92 per 100,000, respectively). Conversely, frail individuals show the slowest peak (day  
296 30) and lowest incidence rate (0.47 per 100,000). Uniform mixing results in the fastest and  
297 highest incidence rate for frail individuals (0.70 per 100,000 after 26 days), while  
298 proportionate mixing shows the lowest incidence rate and slowest peak for non-frail  
299 individuals (3.96 per 100,000 in 32 days).  
300



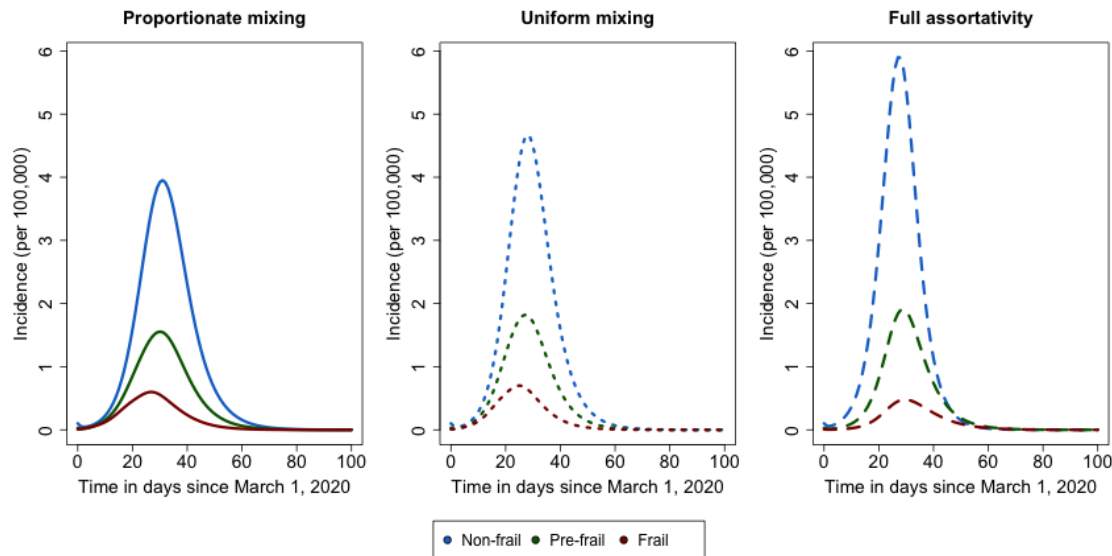

301  
302  
303  
304  
305

**Figure 3:** Comparison of COVID-19-like epidemic curves for the Belgian population with various frailty-based mixing patterns.

#### 306 4. Discussion

307 In this manuscript, we presented the outcomes of the Epicurus study, which was conducted  
308 to investigate social mixing behaviors in the Flemish region, Belgium, from June 2022 to  
309 June 2023. In particular, we focused on older individuals, as existing literature highlights  
310 their significant role in disease transmission [5,20,21], yet there is still a knowledge gap  
311 concerning how their behaviors vary with frailty levels. We conducted simulations using a  
312 compartmental model to describe infectious disease spread, incorporating frailty-dependent  
313 mixing patterns obtained from the study as a proxy of age-specific transmission rates, and  
314 compared outbreak characteristics under various degrees of interactions. In particular, we  
315 have considered the spread dynamics of SARS-CoV-2, given its recent prominence and  
316 significant impact.

317

318 The present work gives important insights for the design of future data collection. In  
319 particular, we observed a notably high response rate when participants were randomly  
320 selected from the national registry. Residents of healthcare facilities demonstrated a keen  
321 willingness to participate in the study, facilitating a smooth data collection process. We found  
322 that the paper version of the survey was preferred over the computer-assisted web interface  
323 (CAWI) or app versions. However, managing incomplete responses posed a challenge as  
324 there was no means to validate the provided answers. Recruiting individuals aged 50-75  
325 years from healthcare facilities presented difficulties, as this demographic typically does not  
326 reside in such facilities unless they have specific medical conditions. This challenge also  
327 extended to individuals with ILI symptoms, as they may not be inclined to participate in  
328 surveys when feeling unwell. In future studies, improving data on ILI symptoms could involve  
329 asking participants about their symptoms and contacts during their most recent ILI period.  
330 This approach may help address the issue, albeit susceptible to recall bias [16].  
331 Alternatively, supplementing national registry data with additional information from general  
332 practitioners could be of added value. When doing so, potential bias towards specific  
333 subpopulations should be carefully considered.

334

335 Our findings indicate distinct contact patterns among different age and frailty groups, with a  
336 particular emphasis on the location where contacts took place. Older frail individuals  
337 predominantly interacted within their homes, potentially increasing the risk of intra-household  
338 outbreaks. This contrasts with younger frail individuals who exhibited more external contacts,  
339 suggesting interactions between age, frailty, and mixing patterns. These findings extend  
340 previous work by Backer et al. (2023), who reported overall reduced contact rates among  
341 frail individuals, by highlighting the disproportionate decrease in external contacts, potentially  
342 due to factors such as physical limitations or social isolation [21]. Understanding the long-  
343 term implications of these distinct contact patterns for disease transmission is essential for  
344 designing effective non-pharmaceutical interventions. Tailoring strategies to limit disease  
345 spread to the specific contact behaviors of vulnerable groups, such as older frail individuals,  
346 can optimize public health efforts by mitigating healthcare burdens, leading to better health  
347 economic outcomes. Additionally, incorporating healthcare costs that depend on frailty into  
348 cost-effectiveness calculations within mathematical models can enhance their accuracy,  
349 leading to more realistic decision-making outcomes [35].

350

351 We further emphasize the impact of considering heterogeneity from varying frailty levels  
352 within populations on the spread of respiratory infectious diseases, using a contact-based  
353 deterministic mathematical model. While maintaining a constant transmission rate across  
354 frailty groups, we observed distinct transmission dynamics. This emphasizes the need for  
355 caution when extrapolating population-level parameters to specific subgroups. Furthermore,  
356 we investigated the impact of frailty levels on transmission dynamics by maintaining a  
357 constant reproductive number. Our results demonstrate significant variations in epidemic  
358 outcomes across different frailty groups, driven by distinct contact patterns [36]. The  
359 presented mathematical model successfully highlights that reliable disease transmission  
360 modeling necessitates a thorough understanding of heterogeneity in mixing patterns, as  
361 ignoring these factors can lead to inaccurate predictions, suboptimal intervention strategies,  
362 and misguided economic evaluations [37]. Future research can enhance the model's realism  
363 by incorporating variations in susceptibility and infectivity, which are key factors in  
364 transmission dynamics, especially when considering the different frailty levels within  
365 individuals.

366

367 The collected data and analysis performed emphasize the importance of collecting detailed  
368 information on contact patterns and investigating their potential role in shaping disease  
369 dynamics, particularly within older individuals and those with varying degrees of frailty. In  
370 addition to obtaining preliminary insights into the social mixing behavior within this cohort,  
371 the study can also be utilized to test the questionnaires and assess the feasibility of  
372 conducting a large-scale contact study. However, it is important to note that our scope does  
373 not encompass comparisons across countries, including any analysis before, during, or after  
374 the COVID-19 pandemic, nor does it delve into future projections. Extrapolating these results  
375 to other countries may not be wise, as each country possesses unique characteristics (e.g.,  
376 cultural and educational background, infrastructure, and social structure) that may  
377 considerably impact the validity of such extrapolations [38]. However, the insights and  
378 methodologies discussed herein can guide potential extensions of this study to a European  
379 context.

380

381 Our study considers frailty alongside chronic disease, as it offers a broader overview of  
382 individual health levels [39]. Nevertheless, we utilized a singular method to calculate frailty,  
383 potentially overlooking variation in contact patterns across different frailty measurements.  
384 Potentially, employing a broader frailty index calculation that encompasses multiple health  
385 indicators could provide deeper insights into the interplay between frailty and contact  
386 behavior. However, constructing such indices can be cumbersome and may induce  
387 participant fatigue if the questionnaire becomes overly lengthy [16]. Future investigations  
388 could employ multidimensional frailty scales to unveil a deeper understanding of how frailty  
389 influences social interactions. Additionally, while COVID-19 and flu vaccinations did not  
390 significantly impact the number of contacts in this study, exploring the effects of vaccines for  
391 other diseases, such as RSV and pneumococcal infections, may provide valuable insights,  
392 particularly for the elderly and high-risk groups [40]. Therefore, future research could delve  
393 deeper to explore these aspects.  
394

## 395 **5. Conclusion**

396 The Epicurus study in Flanders, Belgium, aimed to characterize the social contact patterns  
397 of older individuals and those with varying levels of frailty in relation to disease transmission.  
398 Our findings revealed distinct contact patterns across different frailty levels. By integrating  
399 these patterns into contact-based mathematical modeling, we demonstrated the critical  
400 importance of accounting for frailty-dependent heterogeneity in disease transmission. These  
401 insights contribute to our understanding of how frailty affects contact patterns and disease  
402 spread, emphasizing the need for further data collection and analysis across a broader  
403 population.  
404

## 405 **Ethics declarations**

406 Ethical approval was obtained from the Comité voor Medische Ethiek UHasselt (CME  
407 UHasselt) with Reference Number: CME2021/110.  
408

## 409 **Data availability statement**

410 The datasets generated during and/or analyzed during the current study are available from  
411 the corresponding author upon reasonable request.  
412

## 413 **Acknowledgement**

414 The authors gratefully acknowledge the IMI VITAL project for their valuable input and  
415 feedback during the development of the study protocol. We extend our sincere thanks to the  
416 Ipsos team for conducting the survey, collecting data, and facilitating the rapid progress of  
417 this study. We especially appreciate the exceptional project management support provided  
418 by Sarah Vercruyssen. All important findings will be informed to the IMI VITAL WP3.  
419

## 420 **Funding**

421 Funding for this study [study number: 215366] was provided by GSK. GSK was provided the  
422 opportunity to review a preliminary version of this publication for factual accuracy, but the  
423 authors are solely responsible for final content and interpretation.  
424

## 425 **Author Contributions**

426 NH and LH initiated the study. NH and LH designed the initial survey. NL and LH cleaned  
427 and prepared the data for the platform. NL did the formal analysis and wrote the original draft  
428 with the supervision of LH, MB, AT, and NH. All authors contributed and reviewed the  
429 manuscript and approved the final version for publication.

430  
431

## 432 **Competing Interest**

433 The authors have declared that no competing interests exist.

434

## 435 **References**

- 436 1. Loedy, N., Wallinga, J., Hens, N. & Torneri, A. Repetition in social contacts: implications  
437 in modelling the transmission of respiratory infectious diseases in pre-pandemic and  
438 pandemic settings. *Proc. B* **291**, 20241296 (2024).
- 439 2. VanderWaal, K. L. & Ezenwa, V. O. Heterogeneity in pathogen transmission. *Funct.*  
440 *Ecol.* **30**, 1606–1622 (2016).
- 441 3. Giallorete, L. E. *et al.* Epidemiology and economic burden of herpes zoster and post-  
442 herpetic neuralgia in Italy: a retrospective, population-based study. *BMC Infect. Dis.* **10**,  
443 1–11 (2010).
- 444 4. Docherty, A. B. *et al.* Features of 20 133 UK patients in hospital with covid-19 using the  
445 ISARIC WHO Clinical Characterisation Protocol: prospective observational cohort study.  
446 *bmj* **369**, (2020).
- 447 5. Møgelmoose, S., Neels, K., Beutels, P. & Hens, N. Exploring the impact of population  
448 ageing on the spread of emerging respiratory infections and the associated burden of  
449 mortality. *BMC Infect. Dis.* **23**, 767 (2023).
- 450 6. Møgelmoose, S., Neels, K. & Hens, N. Incorporating human dynamic populations in  
451 models of infectious disease transmission: a systematic review. *BMC Infect. Dis.* **22**, 1–  
452 12 (2022).
- 453 7. Clegg, A., Young, J., Iliffe, S., Rikkert, M. O. & Rockwood, K. Frailty in elderly people.  
454 *The lancet* **381**, 752–762 (2013).
- 455 8. Hoang, T. *et al.* A systematic review of social contact surveys to inform transmission  
456 models of close-contact infections. *Epidemiol. Camb. Mass* **30**, 723 (2019).
- 457 9. Abrams, S. *et al.* Modelling the early phase of the Belgian COVID-19 epidemic using a  
458 stochastic compartmental model and studying its implied future trajectories. *Epidemics*  
459 **35**, 100449 (2021).
- 460 10. Coletti, P. *et al.* A data-driven metapopulation model for the Belgian COVID-19  
461 epidemic: assessing the impact of lockdown and exit strategies. *BMC Infect. Dis.* **21**, 1–  
462 12 (2021).
- 463 11. Jarvis, C. I. *et al.* Quantifying the impact of physical distance measures on the  
464 transmission of COVID-19 in the UK. *BMC Med.* **18**, 1–10 (2020).
- 465 12. Mossong, J. *et al.* Social contacts and mixing patterns relevant to the spread of  
466 infectious diseases. *PLoS Med.* **5**, e74 (2008).
- 467 13. Wong, K. L. *et al.* Social contact patterns during the COVID-19 pandemic in 21  
468 European countries—evidence from a two-year study. *BMC Infect. Dis.* **23**, 268 (2023).
- 469 14. Coletti, P. *et al.* CoMix: comparing mixing patterns in the Belgian population during and  
470 after lockdown. *Sci. Rep.* **10**, 21885 (2020).
- 471 15. Tizzani, M. *et al.* Impact of tiered measures on social contact and mixing patterns of in  
472 Italy during the second wave of COVID-19. *BMC Public Health* **23**, 906 (2023).
- 473 16. Loedy, N. *et al.* Longitudinal social contact data analysis: insights from 2 years of data  
474 collection in Belgium during the COVID-19 pandemic. *BMC Public Health* **23**, 1298  
475 (2023).
- 476 17. Loedy, N., Wallinga, J., Hens, N. & Torneri, A. Repetition in Social Contact Interactions:  
477 Implications in Modelling the Transmission of Respiratory Infectious Diseases in Pre-  
478 pandemic & Pandemic Settings. *medRxiv* 2024–02 (2024).



- 479 18. Liu, C. Y. *et al.* Rapid review of social contact patterns during the COVID-19 pandemic.  
480 *Epidemiol. Camb. Mass* **32**, 781 (2021).
- 481 19. Hu, Y. & Qian, Y. COVID-19, inter-household contact and mental well-being among  
482 older adults in the US and the UK. *Front. Sociol.* **6**, 714626 (2021).
- 483 20. Vanderlocht, J., Møgelmoose, S., Van Kerckhove, K., Beutels, P. & Hens, N. Chronic  
484 Disease Patients Have Fewer Social Contacts: A Pilot Survey with Implications for  
485 Transmission Dynamics. *Available SSRN 4620539*.
- 486 21. Backer, J. A., Van de Kasstelee, J., El Fakiri, F., Hens, N. & Wallinga, J. Contact  
487 patterns of older adults with and without frailty in the Netherlands during the COVID-19  
488 pandemic. *BMC Public Health* **23**, 1829 (2023).
- 489 22. Klovning, A., Sandvik, H. & Hunskaar, S. Web-based survey attracted age-biased  
490 sample with more severe illness than paper-based survey. *J. Clin. Epidemiol.* **62**, 1068–  
491 1074 (2009).
- 492 23. Béraud, G. *et al.* The French connection: the first large population-based contact survey  
493 in France relevant for the spread of infectious diseases. *PLoS One* **10**, e0133203 (2015).
- 494 24. Balestroni, G. & Bertolotti, G. EuroQol-5D (EQ-5D): an instrument for measuring quality  
495 of life. *Monaldi Arch. Chest Dis.* **78**, (2012).
- 496 25. Ware Jr, J. E. SF-36 health survey update. *Spine* **25**, 3130–3139 (2000).
- 497 26. Mitnitski, A. B., Mogilner, A. J. & Rockwood, K. Accumulation of deficits as a proxy  
498 measure of aging. *Sci. World J.* **1**, 323–336 (2001).
- 499 27. Searle, S. D., Mitnitski, A., Gahbauer, E. A., Gill, T. M. & Rockwood, K. A standard  
500 procedure for creating a frailty index. *BMC Geriatr.* **8**, 1–10 (2008).
- 501 28. Song, X., Mitnitski, A. & Rockwood, K. Prevalence and 10-year outcomes of frailty in  
502 older adults in relation to deficit accumulation. *J. Am. Geriatr. Soc.* **58**, 681–687 (2010).
- 503 29. Curran, D. *et al.* Recombinant zoster vaccine is efficacious and safe in frail individuals. *J.*  
504 *Am. Geriatr. Soc.* **69**, 744–752 (2021).
- 505 30. Andrew, M. K., Matthews, S., Kim, J. H., Riley, M. E. & Curran, D. An easy-to-implement  
506 clinical-trial frailty index based on accumulation of deficits: validation in zoster vaccine  
507 clinical trials. *Clin. Interv. Aging* 1261–1274 (2023).
- 508 31. Stasinopoulos, M. D., Rigby, R. A., Heller, G. Z., Voudouris, V. & De Bastiani, F. *Flexible*  
509 *Regression and Smoothing: Using GAMLSS in R*. (CRC Press, 2017).
- 510 32. Funk, S. Socialmixr: social mixing matrices for infectious disease modelling. *R Package*  
511 *Version 01* **8**, (2020).
- 512 33. Willem, L. *et al.* The impact of quality-adjusted life years on evaluating COVID-19  
513 mitigation strategies: lessons from age-specific vaccination roll-out and variants of  
514 concern in Belgium (2020-2022). *BMC Public Health* **24**, 1171 (2024).
- 515 34. Diekmann, O., Heesterbeek, J. A. P. & Metz, J. A. On the definition and the computation  
516 of the basic reproduction ratio  $R_0$  in models for infectious diseases in heterogeneous  
517 populations. *J. Math. Biol.* **28**, 365–382 (1990).
- 518 35. Haji Ali Afzali, H. *et al.* Structuring a conceptual model for cost-effectiveness analysis of  
519 frailty interventions. *PLoS One* **14**, e0222049 (2019).
- 520 36. Coutinho, F. A. B. *et al.* Modelling heterogeneities in individual frailties in epidemic  
521 models. *Math. Comput. Model.* **30**, 97–115 (1999).
- 522 37. Drake, T. L. *et al.* Dynamic transmission economic evaluation of infectious disease  
523 interventions in low- and middle-income countries: a systematic literature review.  
524 *Health Econ.* **25**, 124–139 (2016).
- 525 38. Prem, K. *et al.* Projecting contact matrices in 177 geographical regions: an update and  
526 comparison with empirical data for the COVID-19 era. *PLoS Comput. Biol.* **17**, e1009098  
527 (2021).
- 528 39. Brothers, T. D. *et al.* Frailty in People Aging With Human Immunodeficiency Virus (HIV)  
529 Infection. *J. Infect. Dis.* **210**, 1170–1179 (2014).
- 530 40. De Waure, C. *et al.* Economic value of influenza vaccination. *Hum. Vaccines*  
531 *Immunother.* **8**, 119–129 (2012).
- 532

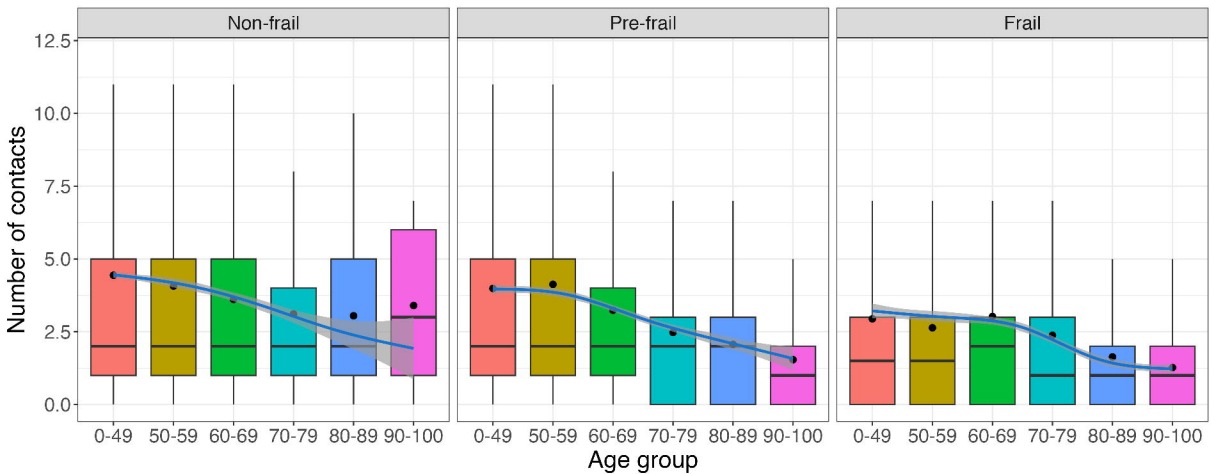

Contacts at home

Contacts not at home

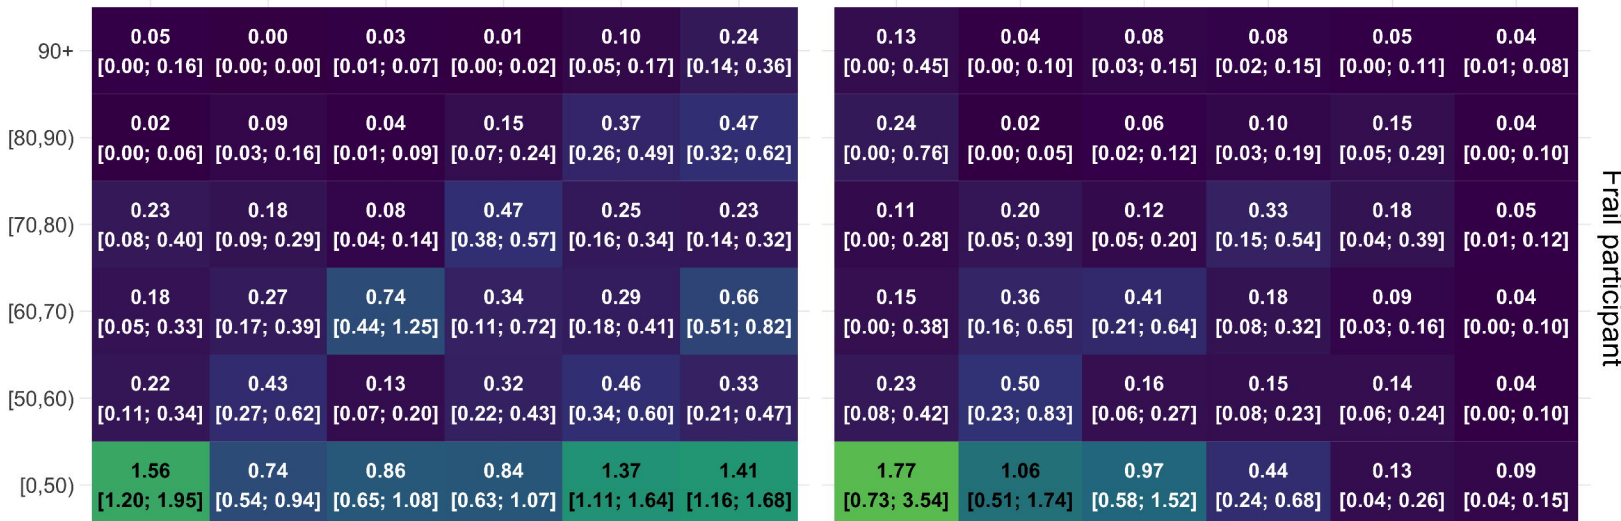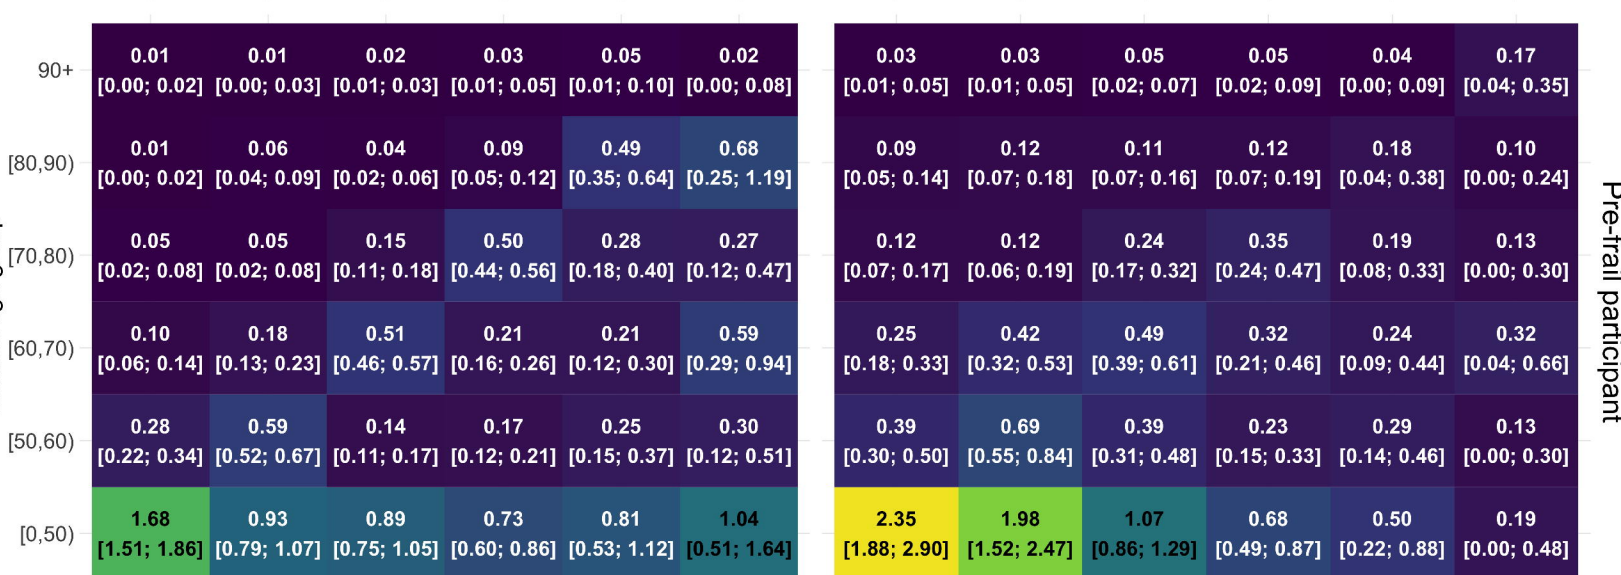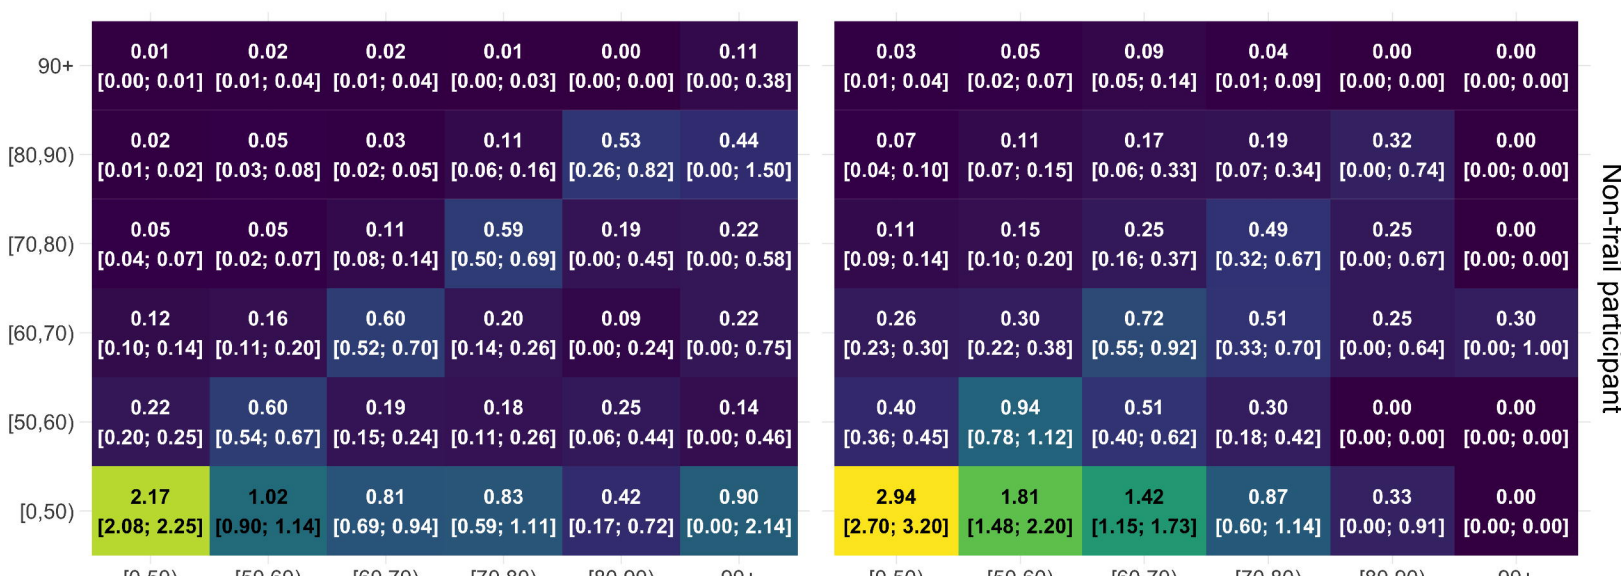

Participant age group

**Proportional mixing**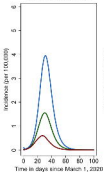**Uniform mixing**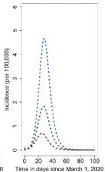**Full assortativity**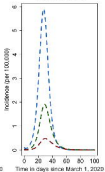

● Non-fail ● Pro-fail ● Fail
